# Supplementary material
Source: Research Square preprint supplement (doi:10.21203/rs.3.rs-10389879/v1)
Supplement: Supplementary file 1 [file 75ee92477833fd5344297dab.docx]

**6. Supplementary Materials**

**Supplementary Methods**

The arithmetic mean, representing the average biosecurity score across farms, was calculated as:

where:

sample mean

observed biosecurity score for the farm

total number of farms

The sample standard deviation, representing variability around the mean, was calculated as:

Distributional shape characteristics were evaluated using skewness and kurtosis. Skewness quantifies the degree of asymmetry, whereas kurtosis reflects the degree of tail heaviness or peakedness of the distribution:

Normality of biosecurity score distributions was assessed using graphical methods (histograms and quantile–quantile plots) and formally tested using the Shapiro–Wilk statistic [34,35]:

where:

ordered observations

Shapiro–Wilk weighting coefficients

Correlations between biosecurity score components were assessed using Pearson’s correlation coefficient:

This statistic quantifies the strength and direction of linear association between biosecurity domains.

2.4.2. Reliability Analysis

Internal consistency reliability of external biosecurity domains was evaluated using Cronbach’s alpha coefficient, which measures the extent to which individual domains represent a unified latent construct [36]:

where:

number of biosecurity domains

variance of individual domain

variance of total composite score

Item–total correlation coefficients were calculated to evaluate the contribution of individual domains to the overall construct:

Reliability was reassessed following sequential removal of individual domains to identify structurally influential components and assess construct robustness.

2.4.3. Principal Component Analysis (PCA)

Principal Component Analysis was performed to identify latent dimensions underlying external biosecurity domains [30].

Prior to analysis, domain scores were standardized to ensure equal weighting:

where:

standardized score

mean

standard deviation

Principal components were extracted through eigenvalue decomposition of the covariance matrix:

where:

covariance matrix

eigenvalue (variance explained)

eigenvector (component loading)

Individual farm component scores were computed as:

where:

principal component score

loading coefficient

Components with eigenvalues greater than 1 were retained [37], and scree plot inspection was used to confirm dimensional structure [38].

2.4.4. Hierarchical Cluster Analysis

Hierarchical clustering was performed using Ward’s minimum variance method [39].

Euclidean distance between farms was calculated as:

Cluster formation was based on minimizing within-cluster variation:

Cluster solutions were evaluated using dendrogram structure and interpretability.

2.4.5. Linear Discriminant Analysis (LDA)

Linear discriminant analysis was used to validate cluster separation [40].

Discriminant function:

Classification accuracy was calculated as:

Equality of covariance matrices was assessed using Box’s M statistic:

2.4.6. Multinomial Logistic Regression

Multinomial regression modeled cluster membership:

Model fit was assessed using Akaike Information Criterion:

2.4.7. Structural Equation Modeling (SEM)

Structural equation modeling evaluated latent biosecurity structure [31].

Measurement model:

Structural model:

Model fit indices:

Comparative Fit Index:

Root Mean Square Error of Approximation:

Standardized Root Mean Square Residual:

2.4.8. Sensitivity Analysis

Cluster stability evaluated using Adjusted Rand Index [41]:

2.4.9. Geographic Association Analysis

Linear regression evaluated geographic effects:

Coefficient of determination:

**Table S1.** Description of external biosecurity variables derived from the Biocheck.UGent™ scoring system in commercial pig farms (n = 76).

| **Variable name** | **Description** | **Data type** | **Measurement scale** |
| --- | --- | --- | --- |
| Farm ID | Unique farm identifier | Character | Nominal |
| Purchase of breeding pigs, weaned piglets and semen | Domain A: Purchase of breeding pigs, weaned piglets and semen score | Numeric | Ratio (0–100) |
| Transportation of animals, removal of deadstock and manure | Domain B: Transportation of animals, removal of deadstock and manure score | Numeric | Ratio (0–100) |
| Feed, water and equipment supply | Domain C: Feed, water and equipment supply score | Numeric | Ratio (0–100) |
| Visitors and farm workers | Domain D: Visitors and farm workers score | Numeric | Ratio (0–100) |
| Vermin and bird control | Domain E: Vermin and bird control score | Numeric | Ratio (0–100) |
| Location of the farm | Domain F: Location of the farm score | Numeric | Ratio (0–100) |
| SUBT-EBS | External biosecurity subtotal score (sum of Domains A–F) | Numeric | Ratio (0–100) |

**Table S2.** Individual Farm Coordinates on Principal Components (PC1–PC5) Derived from PCA of External Biosecurity Subcategories (n = 76 farms)

| **Farm ID** | **PC1** | **PC2** | **PC3** | **PC4** | **PC5** |
| --- | --- | --- | --- | --- | --- |
| 1 | 2.777 | 0.205 | 0.097 | 0.037 | -0.097 |
| 2 | -1.246 | 0.896 | -1.305 | 0.245 | -0.058 |
| 3 | 2.354 | -0.527 | -0.332 | -1.073 | -0.4 |
| 4 | 3.218 | -0.743 | -0.006 | 0.432 | 0.206 |
| 5 | 0.921 | 0.307 | -1.563 | -0.944 | 0.689 |
| 6 | -0.824 | -1.16 | -1.739 | -0.189 | 0.491 |
| 7 | 0.103 | 0.85 | -1.225 | -1.519 | -0.087 |
| 8 | 2.127 | -0.672 | -0.791 | -1.385 | -0.29 |
| 9 | 1.97 | 1.605 | -2.002 | -0.135 | 0.249 |
| 10 | 0.123 | -0.899 | -1.514 | -0.1 | -0.17 |
| 11 | -0.423 | -0.474 | 0.213 | -0.6 | -1.18 |
| 12 | -0.315 | 0.131 | 0.28 | 0.01 | 1.327 |
| 13 | -0.162 | 0.135 | 0.208 | 0.044 | 1.29 |
| 14 | -1.235 | -0.873 | -1.316 | 0.194 | 0.545 |
| 15 | 2.113 | 0.017 | -1.334 | -0.236 | 0.433 |
| 16 | 1.645 | 1.676 | -1.03 | -0.156 | -0.195 |
| 17 | 4.16 | 1.786 | 1.122 | 1.524 | -0.132 |
| 18 | 2.658 | -0.81 | -0.517 | -1.434 | 0.125 |
| 19 | 1.97 | 1.605 | -2.002 | -0.135 | 0.249 |
| 20 | 3.176 | -0.751 | 0.814 | -1.042 | -0.821 |
| 21 | -0.387 | -1.531 | -1.103 | -0.212 | 0.473 |
| 22 | 1.607 | 0.073 | 1.04 | -0.466 | -0.606 |
| 23 | -1.161 | 0.308 | 0.364 | 1.324 | -0.613 |
| 24 | 0.671 | -0.797 | 0.37 | -1.171 | 0.161 |
| 25 | -0.753 | -0.503 | 0.557 | -0.344 | -0.307 |
| 26 | 1.583 | -0.643 | -0.444 | -0.56 | -1.846 |
| 27 | -1.407 | 0.845 | -0.579 | 0.561 | -1.005 |
| 28 | -1.892 | -1.693 | -1.135 | 0.386 | 0.558 |
| 29 | 0.209 | -1.508 | -0.484 | 0.136 | 0.883 |
| 30 | -0.793 | -0.437 | -0.814 | 0.495 | 0.25 |
| 31 | -2.254 | -1.626 | -0.549 | -0.076 | -0.389 |
| 32 | -2.348 | -0.347 | -0.246 | -0.355 | -0.535 |
| 33 | -0.842 | -1.426 | -0.931 | 0.509 | 0.148 |
| 34 | -0.733 | -1.078 | 0.381 | -0.152 | -0.461 |
| 35 | -0.604 | -0.125 | -0.53 | 1.593 | -0.475 |
| 36 | -0.554 | -0.888 | -1.102 | 0.829 | -0.715 |
| 37 | -0.597 | -1.712 | -0.894 | 0.988 | -0.09 |
| 38 | -2.599 | 0.383 | 0.522 | 1.139 | -0.101 |
| 39 | -1.637 | -1.414 | 0.519 | 0.453 | -0.786 |
| 40 | 0.706 | -0.407 | 0.303 | 0.792 | 0.667 |
| 41 | -1.418 | 0.141 | -1.604 | 1.308 | 1.023 |
| 42 | -0.215 | 1.69 | -1.43 | -0.962 | 0.686 |
| 43 | -0.268 | -0.368 | -0.432 | 0.489 | -0.361 |
| 44 | -0.726 | 0.897 | -0.635 | -0.146 | 0.531 |
| 45 | -0.418 | 0.486 | 1.263 | -0.403 | 1.432 |
| 46 | -0.788 | -1.739 | 1.795 | -1.014 | 0.118 |
| 47 | -0.429 | -1.731 | 1.049 | -0.424 | 0.944 |
| 48 | 0.4 | -2.17 | 0.852 | 0.743 | 0.665 |
| 49 | 0.094 | 1.502 | 1.024 | 0.468 | 0.325 |
| 50 | -1.947 | 0.261 | 0.186 | 0.754 | -0.342 |
| 51 | 1.979 | -0.373 | 0.332 | 0.371 | 0.878 |
| 52 | -0.677 | 0.22 | 0.51 | 0.676 | -0.769 |
| 53 | 1.396 | -0.419 | 0.007 | 0.795 | -0.149 |
| 54 | 2.324 | -1.083 | 0.497 | 0.866 | 0.263 |
| 55 | -0.553 | 0.892 | 0.852 | 0.997 | -0.765 |
| 56 | -2.691 | 1.471 | 0.654 | 0.297 | -0.224 |
| 57 | 0.808 | 0.469 | 1.519 | 0.019 | -0.766 |
| 58 | -1.026 | 0.56 | -0.181 | -1.325 | -0.257 |
| 59 | -0.621 | -1.249 | 0.369 | -0.093 | 0.637 |
| 60 | 0.686 | 0.109 | 1.394 | 0.589 | -0.059 |
| 61 | 0.21 | 0.699 | 1.476 | 0.613 | 1.145 |
| 62 | 2.176 | 0.874 | 1.121 | 0.149 | -0.417 |
| 63 | -0.485 | -1.448 | 2.677 | -1.026 | -0.492 |
| 64 | -0.853 | -0.708 | 0.826 | -0.293 | -0.135 |
| 65 | -1.119 | -0.123 | 1.212 | -2.069 | 0.005 |
| 66 | 1.14 | -0.16 | -0.492 | 1.438 | -2.384 |
| 67 | -1.6 | 1.506 | 1.075 | -0.436 | 0.48 |
| 68 | -0.036 | 1.967 | 0.591 | 0.537 | 0.415 |
| 69 | -0.023 | 0.835 | 1.491 | -1.083 | 0.607 |
| 70 | -1.929 | 1.341 | 1.195 | 0.397 | 0.707 |
| 71 | -2.164 | 1.668 | 0.134 | -1.07 | -0.31 |
| 72 | 0.074 | 1.218 | 0.72 | 0.436 | 0.182 |
| 73 | -1.747 | 1.52 | -0.256 | -0.949 | -0.224 |
| 74 | -1.43 | 1.195 | -0.75 | -0.755 | -0.942 |
| 75 | -1.659 | 1.626 | -0.628 | -0.839 | -0.531 |
| 76 | 2.208 | 0.648 | 0.28 | 1.537 | 0.699 |

**Table S3.** Principal Component Scores and Cluster Membership of Farms (n = 76)

| **Farm ID** | **Dim.1** | **Dim.2** | **Dim.3** | **Dim.4** | **Dim.5** | **Cluster** |
| --- | --- | --- | --- | --- | --- | --- |
| RE-SAG1 | 2.777 | 0.205 | 0.097 | 0.037 | -0.097 | 1 |
| RE-SAG2 | -1.246 | 0.896 | -1.305 | 0.245 | -0.058 | 2 |
| RE-SAG3 | 2.354 | -0.527 | -0.332 | -1.073 | -0.4 | 1 |
| RE-SAG4 | 3.218 | -0.743 | -0.006 | 0.432 | 0.206 | 1 |
| RE-SAG5 | 0.921 | 0.307 | -1.563 | -0.944 | 0.689 | 1 |
| RE-SAG6 | -0.824 | -1.16 | -1.739 | -0.189 | 0.491 | 2 |
| RE-SAG7 | 0.103 | 0.85 | -1.225 | -1.519 | -0.087 | 3 |
| RE-SAG8 | 2.127 | -0.672 | -0.791 | -1.385 | -0.29 | 1 |
| RE-SAG9 | 1.97 | 1.605 | -2.002 | -0.135 | 0.249 | 1 |
| RE-SAG10 | 0.123 | -0.899 | -1.514 | -0.1 | -0.17 | 2 |
| RE-IKE1 | -0.423 | -0.474 | 0.213 | -0.6 | -1.18 | 4 |
| RE-IKE2 | -0.315 | 0.131 | 0.28 | 0.01 | 1.327 | 3 |
| RE-IKE3 | -0.162 | 0.135 | 0.208 | 0.044 | 1.29 | 3 |
| RE-IKE4 | -1.235 | -0.873 | -1.316 | 0.194 | 0.545 | 2 |
| RE-IKE5 | 2.113 | 0.017 | -1.334 | -0.236 | 0.433 | 1 |
| RE-IKE6 | 1.645 | 1.676 | -1.03 | -0.156 | -0.195 | 1 |
| RE-IKE7 | 4.16 | 1.786 | 1.122 | 1.524 | -0.132 | 1 |
| RE-IKE8 | 2.658 | -0.81 | -0.517 | -1.434 | 0.125 | 1 |
| RE-IKE9 | 1.97 | 1.605 | -2.002 | -0.135 | 0.249 | 1 |
| RE-IKE10 | 3.176 | -0.751 | 0.814 | -1.042 | -0.821 | 1 |
| EG-ODE1 | -0.387 | -1.531 | -1.103 | -0.212 | 0.473 | 2 |
| EG-ODE2 | 1.607 | 0.073 | 1.04 | -0.466 | -0.606 | 1 |
| EG-ODE3 | -1.161 | 0.308 | 0.364 | 1.324 | -0.613 | 3 |
| EG-ODE4 | 0.671 | -0.797 | 0.37 | -1.171 | 0.161 | 4 |
| EG-ODE5 | -0.753 | -0.503 | 0.557 | -0.344 | -0.307 | 4 |
| EG-ODE6 | 1.583 | -0.643 | -0.444 | -0.56 | -1.846 | 1 |
| EG-ODE7 | -1.407 | 0.845 | -0.579 | 0.561 | -1.005 | 2 |
| EG-ODE8 | -1.892 | -1.693 | -1.135 | 0.386 | 0.558 | 2 |
| EG-ODE9 | 0.209 | -1.508 | -0.484 | 0.136 | 0.883 | 2 |
| EG-ODE10 | -0.793 | -0.437 | -0.814 | 0.495 | 0.25 | 2 |
| EG-OBA1 | -2.254 | -1.626 | -0.549 | -0.076 | -0.389 | 2 |
| EG-OBA2 | -2.348 | -0.347 | -0.246 | -0.355 | -0.535 | 2 |
| EG-OBA3 | -0.842 | -1.426 | -0.931 | 0.509 | 0.148 | 2 |
| EG-OBA4 | -0.733 | -1.078 | 0.381 | -0.152 | -0.461 | 4 |
| EG-OBA5 | -0.604 | -0.125 | -0.53 | 1.593 | -0.475 | 2 |
| EG-OBA6 | -0.554 | -0.888 | -1.102 | 0.829 | -0.715 | 2 |
| EG-OBA7 | -0.597 | -1.712 | -0.894 | 0.988 | -0.09 | 2 |
| EG-OBA8 | -2.599 | 0.383 | 0.522 | 1.139 | -0.101 | 3 |
| EG-OBA9 | -1.637 | -1.414 | 0.519 | 0.453 | -0.786 | 2 |
| EG-OBA10 | 0.706 | -0.407 | 0.303 | 0.792 | 0.667 | 1 |
| YE-ADO 1 | -1.418 | 0.141 | -1.604 | 1.308 | 1.023 | 2 |
| YE-ADO2 | -0.215 | 1.69 | -1.43 | -0.962 | 0.686 | 3 |
| YE-ADO3 | -0.268 | -0.368 | -0.432 | 0.489 | -0.361 | 2 |
| YE-ADO4 | -0.726 | 0.897 | -0.635 | -0.146 | 0.531 | 2 |
| YE-ADO5 | -0.418 | 0.486 | 1.263 | -0.403 | 1.432 | 3 |
| YE-ADO6 | -0.788 | -1.739 | 1.795 | -1.014 | 0.118 | 4 |
| YE-ADO7 | -0.429 | -1.731 | 1.049 | -0.424 | 0.944 | 4 |
| YE-ADO8 | 0.4 | -2.17 | 0.852 | 0.743 | 0.665 | 4 |
| YE-ADO9 | 0.094 | 1.502 | 1.024 | 0.468 | 0.325 | 3 |
| YE-ADO10 | -1.947 | 0.261 | 0.186 | 0.754 | -0.342 | 3 |
| YE-ADO11 | 1.979 | -0.373 | 0.332 | 0.371 | 0.878 | 1 |
| YE-ADO12 | -0.677 | 0.22 | 0.51 | 0.676 | -0.769 | 3 |
| YE-ADO13 | 1.396 | -0.419 | 0.007 | 0.795 | -0.149 | 1 |
| YE-ADO14 | 2.324 | -1.083 | 0.497 | 0.866 | 0.263 | 1 |
| YE-ADO15 | -0.553 | 0.892 | 0.852 | 0.997 | -0.765 | 3 |
| YE-ADO16 | -2.691 | 1.471 | 0.654 | 0.297 | -0.224 | 3 |
| YE-NORTH01 | 0.808 | 0.469 | 1.519 | 0.019 | -0.766 | 1 |
| YE-NORTH02 | -1.026 | 0.56 | -0.181 | -1.325 | -0.257 | 3 |
| YE-NORTH03 | -0.621 | -1.249 | 0.369 | -0.093 | 0.637 | 4 |
| YE-NORTH04 | 0.686 | 0.109 | 1.394 | 0.589 | -0.059 | 1 |
| YE-NORTH05 | 0.21 | 0.699 | 1.476 | 0.613 | 1.145 | 3 |
| YE-NORTH06 | 2.176 | 0.874 | 1.121 | 0.149 | -0.417 | 1 |
| YE-NORTH07 | -0.485 | -1.448 | 2.677 | -1.026 | -0.492 | 4 |
| YE-NORTH08 | -0.853 | -0.708 | 0.826 | -0.293 | -0.135 | 4 |
| YE-NORTH09 | -1.119 | -0.123 | 1.212 | -2.069 | 0.005 | 4 |
| YE-NORTH0 | 1.14 | -0.16 | -0.492 | 1.438 | -2.384 | 1 |
| YE-NORTH11 | -1.6 | 1.506 | 1.075 | -0.436 | 0.48 | 3 |
| YE-NORTH12 | -0.036 | 1.967 | 0.591 | 0.537 | 0.415 | 3 |
| YE-NORTH13 | -0.023 | 0.835 | 1.491 | -1.083 | 0.607 | 3 |
| YE-NORTH14 | -1.929 | 1.341 | 1.195 | 0.397 | 0.707 | 3 |
| YE-NORTH15 | -2.164 | 1.668 | 0.134 | -1.07 | -0.31 | 3 |
| YE-NORTH16 | 0.074 | 1.218 | 0.72 | 0.436 | 0.182 | 3 |
| YE-NORTH17 | -1.747 | 1.52 | -0.256 | -0.949 | -0.224 | 3 |
| YE-NORTH18 | -1.43 | 1.195 | -0.75 | -0.755 | -0.942 | 3 |
| YE-NORTH19 | -1.659 | 1.626 | -0.628 | -0.839 | -0.531 | 3 |
| YE-NORTH20 | 2.208 | 0.648 | 0.28 | 1.537 | 0.699 | 1 |

**Supplementary Table 1**. Distributional characteristics of external, internal, and overall biosecurity scores among pig farms in Ogun State, Nigeria (n = 76)

| **Distributional statistic** | **External biosecurity score (EBS)** | **Internal biosecurity score (IBS)** | **Overall biosecurity score (EBS + IBS)** |
| --- | --- | --- | --- |
| Median (Q2) | 46 | 67 | 58 |
| 25th percentile (Q1) | 37.5 | 59.5 | 52 |
| 75th percentile (Q3) | 56.5 | 73.5 | 64.5 |
| 5th percentile (P5) | 26 | 41 | 36 |
| 95th percentile (P95) | 74 | 88 | 77 |
| Skewness | 0.49 | −0.37 | −0.30 |
| Kurtosis | 2.53 | 2.97 | 3.05 |

**Supplementary Table 2**. Shapiro–Wilk normality test for external, internal, and overall biosecurity scores (n = 76 farms)

| **Biosecurity score** | **W statistic** | **p-value** | **Interpretation** |
| --- | --- | --- | --- |
| External biosecurity score | 0.962 | 0.024 | Slight deviation from normality |
| Internal biosecurity score | 0.983 | 0.39 | Normally distributed |
| Overall biosecurity score | 0.985 | 0.524 | Normally distributed |

**Supplementary Table 3.** Pearson correlations between external, internal, and overall biosecurity scores among pig farms (n = 76)

| **Score comparison** | **Correlation (r)** | **95% CI** | **p-value** |
| --- | --- | --- | --- |
| External vs Internal | 0.337 | 0.120 – 0.523 | 0.0029 |
| External vs Overall | 0.834 | 0.750 – 0.892 | <0.001 |
| Internal vs Overall | 0.8 | 0.701 – 0.869 | <0.001 |

**Supplementary Table 4.** Distribution summary of external and internal biosecurity scores among pig farms in Ogun State, Nigeria (n = 76)

| **Statistic** | **External biosecurity score** | **Internal biosecurity score** |
| --- | --- | --- |
| Minimum | 22 | 30 |
| 25th percentile | 37.5 | 59.5 |
| Median | 46 | 67 |
| Mean | 48.37 | 65.92 |
| 75th percentile | 56.5 | 73.5 |
| Maximum | 85 | 92 |
| Standard deviation | 14.39 | 13.2 |

**Supplementary Table 5.** Internal consistency reliability of external biosecurity domains (A–F) assessed using Cronbach’s alpha (n = 76 farms).

| ***Panel A****. Overall Reliability Statistics* | | | | | | | | | | | | | | | | | |
| --- | --- | --- | --- | --- | --- | --- | --- | --- | --- | --- | --- | --- | --- | --- | --- | --- | --- |
| **Statistic** | | | | | | | | | | | | **Value** | | | | | |
| Cronbach’s alpha (raw) | | | | | | | | | | | | 0.65 | | | | | |
| Standardized alpha | | | | | | | | | | | | 0.67 | | | | | |
| G6 (SMC) | | | | | | | | | | | | 0.69 | | | | | |
| Average inter-item correlation | | | | | | | | | | | | 0.26 | | | | | |
| Signal-to-noise ratio (S/N) | | | | | | | | | | | | 2.1 | | | | | |
| Standard error of alpha | | | | | | | | | | | | 0.061 | | | | | |
| Mean domain score | | | | | | | | | | | | 49 | | | | | |
| Standard deviation (overall scale) | | | | | | | | | | | | 14 | | | | | |
| Median inter-item correlation | | | | | | | | | | | | 0.27 | | | | | |
|  | | | | | | | | | | | | | | | | | |
| 95% Confidence Interval for Cronbach’s Alpha | | | | | | | | | | | | | | | | | |
| **Method** | **Lower** | | | | | **Alpha** | | | | | | **Upper** | | | | | |
| Feldt | 0.52 | | | | | 0.65 | | | | | | 0.76 | | | | | |
| Duhachek | 0.53 | | | | | 0.65 | | | | | | 0.77 | | | | | |
|  | | | | | | | | | | | | | | | | | |
| ***Panel B.*** *Reliability if Domain Is Dropped* | | | | | | | | | | | | | | | | | |
| **Subcategory** | | | **Raw α** | | **Std. α** | **G6 (SMC)** | | | **Avg. r** | | **S/N** | | | **α SE** | | **Median r** | |
| Purchase of breeding pigs, weaned piglets and semen | | | 0.65 | | 0.67 | 0.66 | | | 0.29 | | 2 | | | 0.062 | | 0.29 | |
| Transportation of animals, removal of deadstock and manure | | | 0.53 | | 0.53 | 0.53 | | | 0.19 | | 1.1 | | | 0.083 | | 0.17 | |
| Feed, water and equipment supply | | | 0.66 | | 0.69 | 0.69 | | | 0.31 | | 2.3 | | | 0.063 | | 0.29 | |
| Visitors and farm workers | | | 0.56 | | 0.59 | 0.6 | | | 0.23 | | 1.5 | | | 0.078 | | 0.23 | |
| Vermin and bird control | | | 0.62 | | 0.65 | 0.65 | | | 0.27 | | 1.8 | | | 0.067 | | 0.28 | |
| Location of the farm | | | 0.62 | | 0.63 | 0.65 | | | 0.26 | | 1.7 | | | 0.067 | | 0.28 | |
|  | | | | | | | | | | | | | | | | | |
| ***Panel C.*** *Item-Level Statistics* | | | | | | | | | | | | | | | | | |
| **Subcategory** | | | | **n** | | **Raw r** | | **Std r** | | **Corrected r (r.cor)** | | **Item-total correlation (r.drop)** | | | **Mean** | | **SD** |
| Purchase of breeding pigs, weaned piglets and semen | | | | 76 | | 0.56 | | 0.53 | | 0.4 | | 0.29 | | | 56 | | 27 |
| Transportation of animals, removal of deadstock and manure | | | | 76 | | 0.78 | | 0.81 | | 0.8 | | 0.67 | | | 45 | | 18 |
| Feed, water and equipment supply | | | | 76 | | 0.39 | | 0.47 | | 0.29 | | 0.21 | | | 44 | | 16 |
| Visitors and farm workers | | | | 76 | | 0.7 | | 0.7 | | 0.64 | | 0.52 | | | 43 | | 22 |
| Vermin and bird control | | | | 76 | | 0.62 | | 0.58 | | 0.46 | | 0.36 | | | 54 | | 27 |
| Location of the farm | | | | 76 | | 0.63 | | 0.61 | | 0.48 | | 0.37 | | | 51 | | 28 |
|  | | | | | | | | | | | | | | | | | |
| **Principal Component** | | **Eigenvalue** | | | | | **% Variance Explained** | | | | | | **Cumulative % Variance** | | | | |
| Component 1 | | 2.375 | | | | | 39.59 | | | | | | 39.59 | | | | |
| Component 2 | | 1.152 | | | | | 19.21 | | | | | | 58.79 | | | | |
| Component 3 | | 0.993 | | | | | 16.55 | | | | | | 75.34 | | | | |
| Component 4 | | 0.66 | | | | | 11 | | | | | | 86.35 | | | | |
| Component 5 | | 0.469 | | | | | 7.81 | | | | | | 94.16 | | | | |
| Component 6 | | 0.351 | | | | | 5.84 | | | | | | 100 | | | | |

**Supplementary Table 6 .** Principal Component Loadings for External Biosecurity Domains

| **Subcategory** | **PC1** | **PC2** | **PC3** | **PC4** | **PC5** |
| --- | --- | --- | --- | --- | --- |
| Purchase of breeding pigs, weaned piglets and semen | 0.538 | -0.411 | -0.637 | 0.119 | 0.253 |
| Transportation of animals, removal of deadstock and manure | 0.84 | 0.018 | -0.254 | 0.098 | -0.09 |
| Feed, water and equipment supply | 0.375 | 0.777 | 0.082 | 0.462 | 0.14 |
| Visitors and farm workers | 0.738 | -0.29 | 0.318 | 0.155 | -0.447 |
| Vermin and bird control | 0.589 | -0.261 | 0.629 | -0.114 | 0.417 |
| Location of the farm | 0.591 | 0.477 | -0.136 | -0.621 | -0.05 |

**Supplementary Table 7.** Sensitivity analyses of cluster robustness under alternative clustering scenarios using Adjusted Rand Index (ARI) (n = 76 farms)

| **Sensitivity scenario** | **What was changed (vs primary PCA-based clustering)** | **ARI vs primary clusters** | **Interpretation (cluster stability)** |
| --- | --- | --- | --- |
| 1. Direct clustering on standardized domain scores | Hierarchical clustering (Ward.D2) performed directly on scaled domain scores (no PCA) | 0.854 | High agreement → clusters are largely consistent even without PCA. |
| 2. PCA + clustering using only complete domains (exclude H/I/J) | PCA and clustering repeated after excluding domains with substantial missingness (H, I, J) | 0.619 | Moderate agreement → removing incomplete domains changes the typology meaningfully; missing internal domains may carry clustering signal. |
| 3. PCA + clustering after excluding extreme outlier farms | Farms flagged as extreme outliers (>3 SD in any domain) removed, then PCA + clustering repeated | 0.738 | Moderate-to-high agreement → clusters are reasonably stable, though outliers influence some assignments. |

**Supplementary Table 8.** Assumption checks for Linear Discriminant Analysis used to validate biosecurity clusters (n = 76 farms)

| ***Panel A****. Shapiro–Wilk tests for normality of predictors within clusters* | | | | | | | | |
| --- | --- | --- | --- | --- | --- | --- | --- | --- |
| **Predictor (External biosecurity domain)** | | | **Cluster 1 W (p-value)** | | **Cluster 2 W (p-value)** | | **Cluster 3 W (p-value)** | **Cluster 4 W (p-value)** |
| Purchase of breeding pigs, piglets, and semen | | | 0.845 (0.002) | | 0.863 (0.011) | | 0.919 (0.063) | 0.886 (0.123) |
| Transportation, removal of deadstock and manure | | | 0.957 (0.401) | | 0.969 (0.766) | | 0.949 (0.275) | 0.903 (0.199) |
| Feed, water, and equipment supply | | | 0.917 (0.056) | | 0.916 (0.097) | | 0.962 (0.494) | 0.883 (0.113) |
| Visitors and farm workers | | | 0.971 (0.704) | | 0.932 (0.192) | | 0.941 (0.192) | 0.948 (0.615) |
| Vermin and bird control | | | 0.887 (0.014) | | 0.916 (0.094) | | 0.937 (0.156) | 0.925 (0.366) |
| Location of the farm | | | 0.877 (0.009) | | 0.926 (0.148) | | 0.965 (0.567) | 0.882 (0.109) |
|  | | | | | | | | |
| ***Panel B.*** *Box’s M test for homogeneity of covariance matrices* | | | | | | | | |
| **Test** | **Chi-square** | **df** | | **p-value** | | **Interpretation** | | |
| Box’s M | 91.212 | 63 | | 0.0116 | | Covariance matrices differ significantly | | |

**Supplementary Table 9 .** Linear Discriminant Analysis results for classification of farms into biosecurity clusters

| ***Panel A.*** *Prior probabilities of cluster membership* | | | | |
| --- | --- | --- | --- | --- |
| **Cluster** | | **Prior probability** | | |
| Cluster 1 | | 0.303 | | |
| Cluster 2 | | 0.25 | | |
| Cluster 3 | | 0.303 | | |
| Cluster 4 | | 0.145 | | |
|  | | | | |
| ***Panel B.*** *Standardized coefficients of linear discriminant functions* | | | | |
| **Domain** | **LD1** | | **LD2** | **LD3** |
| Purchase of breeding pigs | 0.0075 | | −0.0451 | −0.0149 |
| Transportation | 0.0431 | | 0.0052 | −0.0046 |
| Feed, water, equipment | 0.0161 | | 0.0288 | −0.0604 |
| Visitors and workers | 0.041 | | −0.0197 | 0.0134 |
| Vermin and bird control | 0.0054 | | 0.0208 | 0.0273 |
| Location | 0.0207 | | 0.0214 | 0.002 |
|  | | | | |
| *Overall classification performance* | | | | |
| **Metric** | | | **Value** | |
| Classification accuracy | | | 94.70% | |

**Supplementary Table 10.** Multinomial logistic regression model fit statistics for prediction of farm biosecurity cluster membership (reference category: Cluster 1; n = 76 farms)

| **Model parameter** | **Value** |
| --- | --- |
| Model specification | multinom(cluster ~ domain scores) |
| Model convergence | Converged successfully |
| Residual deviance | 0.00014 |
| Akaike Information Criterion (AIC) | 42 |

**Supplementary Table 11.** Multinomial logistic regression coefficients, standard errors, and statistical significance for prediction of biosecurity cluster membership

| ***Panel A.*** *Estimated regression coefficients (β)* | | | |
| --- | --- | --- | --- |
| **Predictor** | **Cluster 2 vs Cluster 1** | **Cluster 3 vs Cluster 1** | **Cluster 4 vs Cluster 1** |
| Intercept | 392.61 | 318.56 | 337.37 |
| Purchase of breeding pigs, weaned piglets and semen | 1.82 | −2.23 | −1.20 |
| Transportation of animals, removal of deadstock and manure | −2.79 | −1.45 | −2.05 |
| Feed, water and equipment supply | −2.08 | 0.33 | −6.44 |
| Visitors and farm workers | −1.84 | −1.76 | −0.55 |
| Vermin and bird control | −2.99 | −1.15 | 1.37 |
| Location of the farm | −1.41 | −0.16 | −0.04 |
|  | | | |
| ***Panel B.*** *Standard errors (SE)* | | | |
| **Predictor** | **Cluster 2 vs Cluster 1** | **Cluster 3 vs Cluster 1** | **Cluster 4 vs Cluster 1** |
| Intercept | 97.52 | 87.77 | 4.45 |
| Purchase domain | 651.26 | 670.49 | 2453.03 |
| Transportation domain | 435.13 | 418.93 | 1808.3 |
| Feed domain | 166.39 | 197.43 | 944.66 |
| Visitors domain | 459.79 | 435.76 | 1210.07 |
| Vermin domain | 132.65 | 129.94 | 2718.69 |
| Location domain | 536.23 | 540.83 | 1466.35 |
|  | | | |
| ***Panel C.*** *Wald test p-values* | | | |
| **Predictor** | **Cluster 2 vs Cluster 1** | **Cluster 3 vs Cluster 1** | **Cluster 4 vs Cluster 1** |
| Intercept | <0.001 | <0.001 | <0.001 |
| Purchase domain | 0.998 | 0.997 | 0.999 |
| Transportation domain | 0.995 | 0.997 | 0.999 |
| Feed domain | 0.99 | 0.999 | 0.995 |
| Visitors domain | 0.997 | 0.997 | 0.999 |
| Vermin domain | 0.982 | 0.993 | 0.999 |
| Location domain | 0.998 | 1.000 | 1.000 |

**Supplementary Table 12.** Classification performance of multinomial logistic regression model for prediction of biosecurity clusters

| ***Panel A.*** *Confusion matrix (Observed vs Predicted cluster membership)* | | | | |
| --- | --- | --- | --- | --- |
| **Observed cluster** | **Predicted Cluster 1** | **Cluster 2** | **Cluster 3** | **Cluster 4** |
| Cluster 1 | 23 | 0 | 0 | 0 |
| Cluster 2 | 0 | 19 | 0 | 0 |
| Cluster 3 | 0 | 0 | 23 | 0 |
| Cluster 4 | 0 | 0 | 0 | 11 |
|  | | | | |
| ***Panel B.*** *Overall classification performance* | | | | |
| **Performance metric** | | | | **Value** |
| Overall classification accuracy | | | | 100% |

**Supplementary Table 13.** Relative Contributions of External Biosecurity Domains to the Latent External Biosecurity Construct

| **Rank** | **Subcategory** | **Estimate** | **Standardized Estimate** | **p-value** |
| --- | --- | --- | --- | --- |
| 1 | Purchase of breeding pigs, weaned piglets and semen | 0.531 | 0.494 | <0.001 |
| 2 | Transportation of animals, removal of deadstock and manure | 0.411 | 0.255 | <0.001 |
| 3 | Visitors and farm workers | 0.31 | 0.239 | <0.001 |
| 4 | Feed, water and equipment supply | 0.392 | 0.221 | <0.001 |
| 5 | Vermin and bird control | 0.199 | 0.186 | <0.001 |
| 6 | Location of the farm | 0.187 | 0.18 | <0.001 |

**Supplementary Table 14.** Residual and latent variances from structural equation model

| ***Panel A.*** *Residual variances of observed categories* | | | | | | | | | |
| --- | --- | --- | --- | --- | --- | --- | --- | --- | --- |
| **Category** | | **Residual variance estimate** | **Standard error** | | **z-value** | | **p-value** | | **Standardized residual variance** |
| Purchase of breeding pigs, weaned piglets and semen | | 391.337 | 51.482 | | 7.601 | | <0.001 | | 0.545 |
| Transportation of animals, removal of deadstock and manure | | 233.399 | 33.367 | | 6.995 | | <0.001 | | 0.729 |
| Feed, water and equipment supply | | 215.25 | 30.603 | | 7.034 | | <0.001 | | 0.811 |
| Visitors and farm workers | | 380.194 | 53.915 | | 7.052 | | <0.001 | | 0.77 |
| Vermin and bird control | | 613.001 | 89.245 | | 6.869 | | <0.001 | | 0.843 |
| Location of the farm | | 647.767 | 94.543 | | 6.852 | | <0.001 | | 0.845 |
|  | | | | | | | | | |
| ***Panel B.*** *Latent variable variance* | | | | | | | | | |
| **Latent variable** | **Variance estimate** | | | **Standard error** | | **z-value** | | **p-value** | |
| External biosecurity | 326.792 | | | 90.34 | | 3.617 | | <0.001 | |

**Supplementary Table 15.** Association Between Administrative Area and Biosecurity Scores (n = 76 farms)

| **Predictor** | **Total Biosecurity Score (β ± SE)** | **t-value** | **p-value** | **External Biosecurity (β ± SE)** | **t-value** | **p-value** | **Internal Biosecurity (β ± SE)** | **t-value** | **p-value** |
| --- | --- | --- | --- | --- | --- | --- | --- | --- | --- |
| Intercept (Area 1) | 98.709 ± 5.842 | 16.897 | <0.001 | 48.800 ± 2.920 | 16.713 | <0.001 | 49.909 ± 2.995 | 16.662 | <0.001 |
| Area 2 | −5.453 ± 8.347 | −0.653 | 0.516 | −2.425 ± 4.172 | −0.581 | 0.563 | −3.028 ± 4.280 | −0.707 | 0.482 |
| Area 3 | 2.371 ± 8.107 | 0.292 | 0.771 | 2.200 ± 4.052 | 0.543 | 0.589 | 0.171 ± 4.157 | 0.041 | 0.967 |

**Supplementary Table 16.** Model Fit Statistics for Geographic Association Models

| **Statistic** | **Total Biosecurity** | **External Biosecurity** | **Internal Biosecurity** |
| --- | --- | --- | --- |
| Residual SE | 29.21 | 14.6 | 14.98 |
| R² | 0.013 | 0.017 | 0.01 |
| Adjusted R² | −0.014 | −0.010 | −0.018 |
| F-statistic | 0.473 | 0.638 | 0.356 |
| Model p-value | 0.625 | 0.532 | 0.701 |


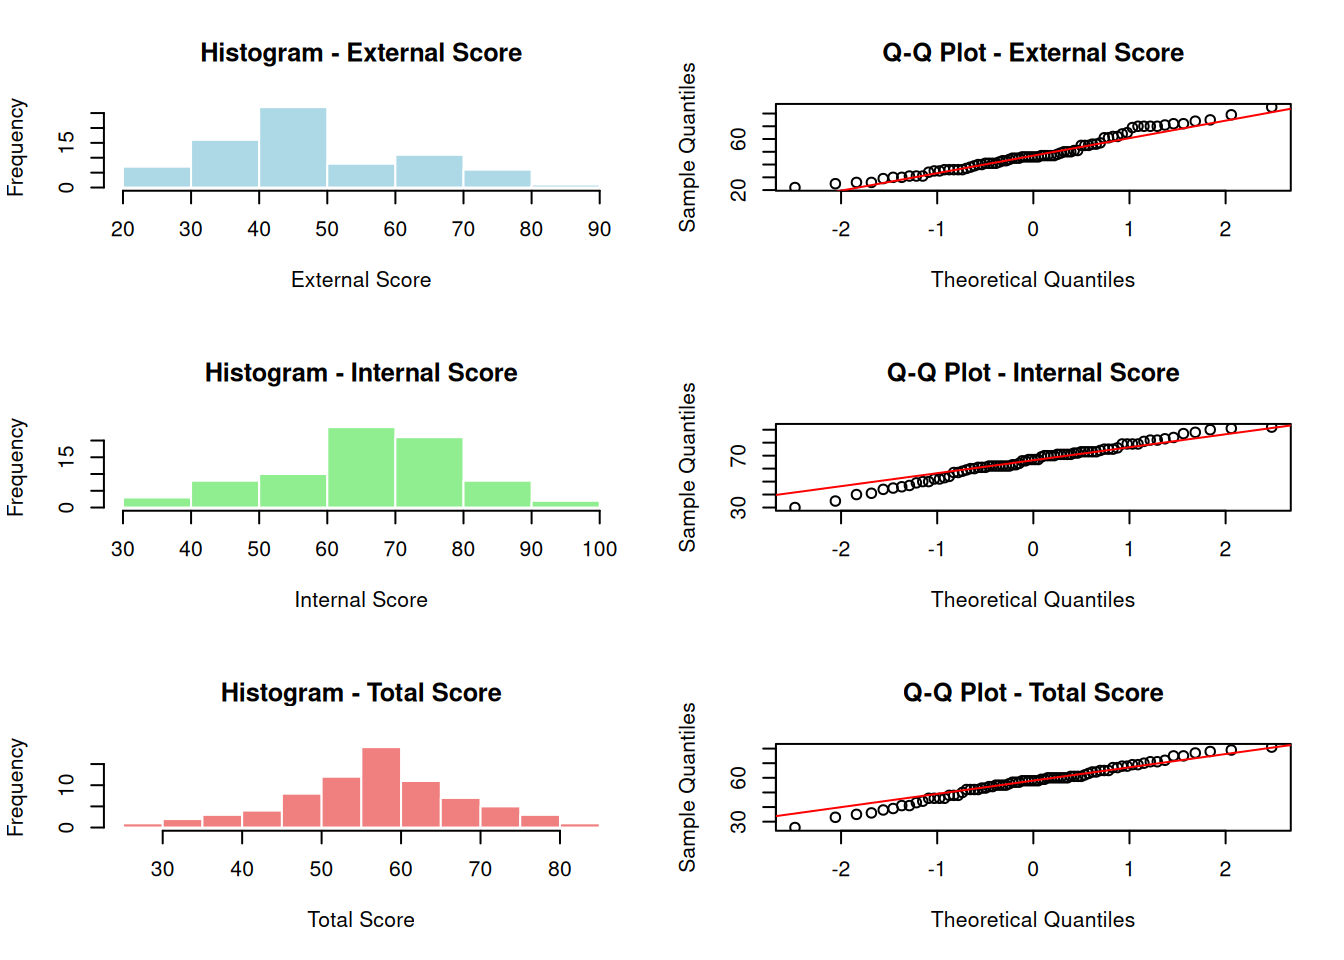


**Supplementary Figure 1.** Distribution of external, internal, and overall biosecurity scores among pig farms (n = 76)


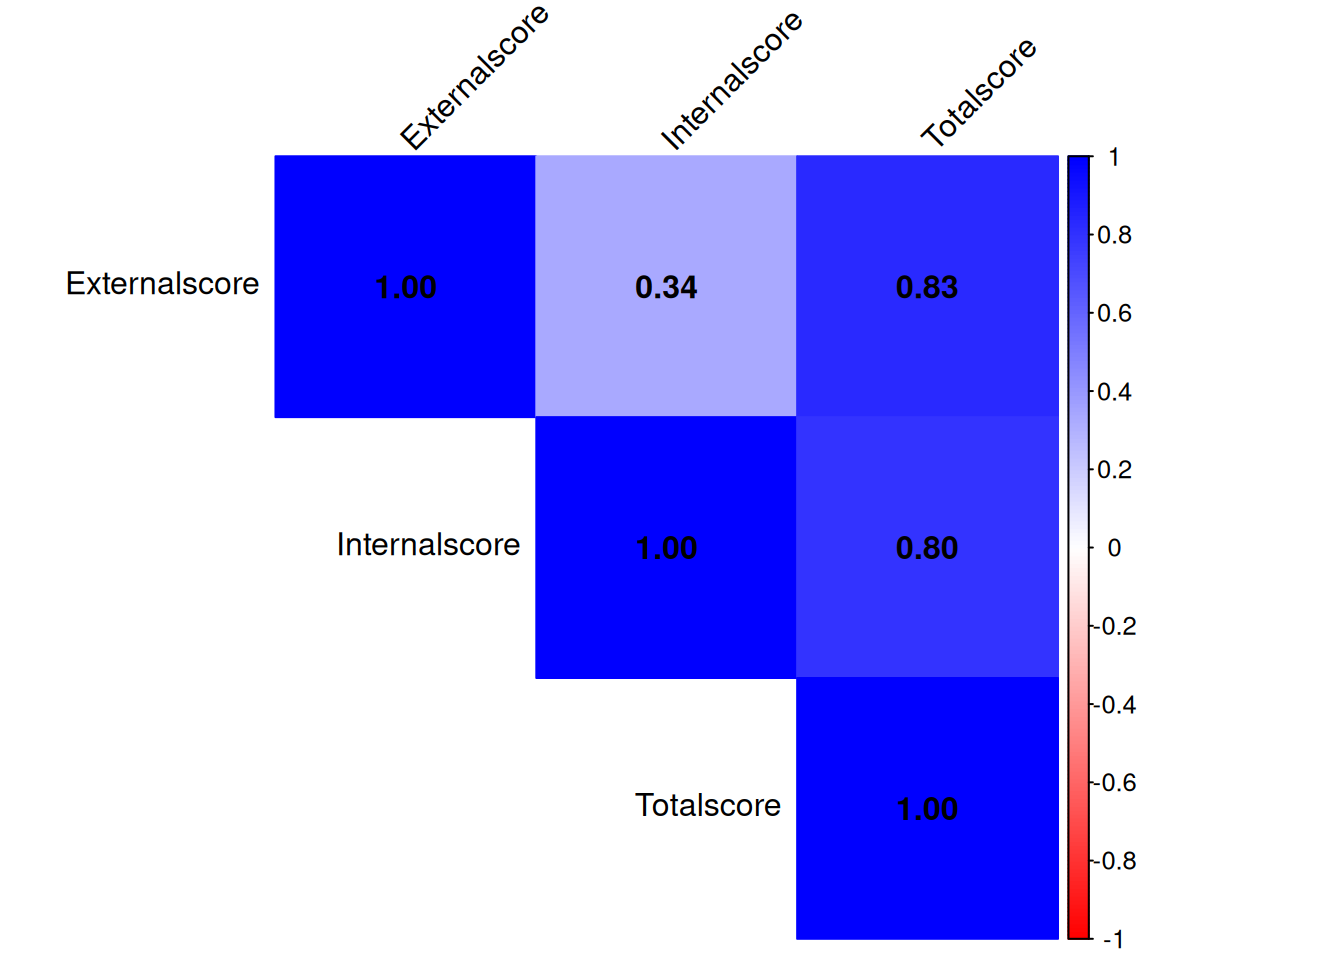


**Supplementary Figure 2.** Correlation heatmap showing relationships between external, internal, and overall biosecurity scores among pig farms (n = 76)
